# Supplementary material for: Negative frequency dependent selection on sympatric mtDNA haplotypes in Drosophila subobscura
Source: PubMed Central journal article supplement (PMC5226107; doi:10.1186/s41065-016-0020-2), 2016-11-24
Supplement: 41065_2016_20_MOESM1_ESM.pdf [file 41065_2016_20_MOESM1_ESM.pdf]

## Example SimuPop Script.txt

```
# Script to MC simulate dynamics of the two mtDNA haplotypes
# in Oliver et al's D subobscura cage populations
import simuOpt, os, sys, types, time, random
import simuPOP as sim

start_time = time.time()

# Create new textfile
fileHandle = open ( 'SUB.run.txt', 'w' )
fileHandle.close()

for i in range (1,50):
    print i
    #parameters
    popSize = 500
    generations = 34
    replications = 4

    def demo(gen, pop):
        if gen < 2:
            return 500
        if gen > 1:
            while True:
                loopPopSize = random.normalvariate(1591, 679)
                if (loopPopSize > 398):
                    break
            return [loopPopSize]
    pop = sim.Population(size=popSize, ploidy=1, loci=1, infoFields=['fitness', 'bogus'])

# Setting selection coefficients as population variables
pop.dvars().SI = random.uniform(0.0, 0.3)
pop.dvars().TI = random.uniform(0.0, 0.3)
pop.dvars().SII = random.uniform(0.0, 0.3)
```

## Example SimuPop Script.txt

```
pop.dvars().TII= random.uniform(0.0, 0.3)
print(pop.vars())
pop.dvars().I = i

fileHandle = open ( 'SUB.run.txt', 'a' )
fileHandle.write ( 'StartRun ' + '\t' + str(i) + '\t' + str(pop.dvars().SI) + '\t' + str(pop.dvars().TI) + '\t' + str(pop.dvars().SII) + '\t' + str(pop.dvars().TII) )
fileHandle.write ( '\t' )
fileHandle.close()

# Initiate replication
simu = sim.Simulator(pop, rep=4)

simu.evolve(
  initOps=[
    sim.InitGenotype(freq=[0.5, 0.5])
  ],
  preOps=[
    sim.Stat(alleleFreq=0),
    sim.InfoExec("""fitness = {
0: 1+SI-(T1*alleleFreq[0][0]),
1: 1+SII-(TII*alleleFreq[0][1])}[ind.allele(0,)]""",
    exposeInd='ind'),
    sim.Stat(meanOfInfo='fitness'),
  ],
  matingScheme=sim.RandomSelection(subPopSize=demo, ops=sim.CloneGenoTransmitter(infoFields='bogus'), selectionField='fitness'),
  postOps=[
    sim.Stat(alleleFreq=0, at=[3, 6, 9, 12, 15, 18, 21, 23, 28, 33]),
    sim.Stat(popSize=True),
    sim.PyEval(r"""Run %d\t%2d\t%s\t%.3ft%.3ft' % (I, gen, subPopSize, alleleFreq[0][0], alleleFreq[0][1])", at=[3, 6, 9, 12, 15, 18, 21, 23, 28, 33],
output='>>>SUB.run.txt'),
  ],
  gen = generations
)
```

### Example SimuPop Script.txt

```
fileHandle = open ( 'SUB.run.txt', 'a' )  
fileHandle.write ( '\n' )  
fileHandle.close()
```
